# Supplementary material for: A fifteen-million-year surface- and subsurface-integrated TEX 86 temperature record from the eastern equatorial Atlantic
Source: Copernicus journal article supplement (doi:10.5194/cp-2021-92), 2021-09-09
Supplement: Supplementary file 1 [file cp-2021-92-supplement.zip]

# **Supplement to: A fifteen-million-year surface- and subsurface-integrated TEX<sub>86</sub> temperature record from the eastern equatorial Atlantic**

Carolien M. H. van der Weijst<sup>1</sup>, Koen J. van der Laan<sup>1</sup>, Francien Peterse<sup>1</sup>, Gert-Jan Reichart<sup>1,2</sup>, Francesca Sangiorgi<sup>1</sup>, Stefan Schouten<sup>1,2</sup>, Tjerk J.T. Veenstra<sup>1</sup>, Appy Sluijs<sup>1</sup>

<sup>1</sup>Department of Earth Sciences, Utrecht University, 3584 CB Utrecht, the Netherlands

<sup>2</sup>NIOZ Royal Netherlands Institute for Sea Research, 1797 SZ 't Horntje, the Netherlands

*Correspondence to:* C.M.H. van der Weijst (c.m.h.vanderweijst@uu.nl)

## **Content**

- Figure S1 and S2
- New Site 959 data (biomarker proxies and palynology) in .xlsx file

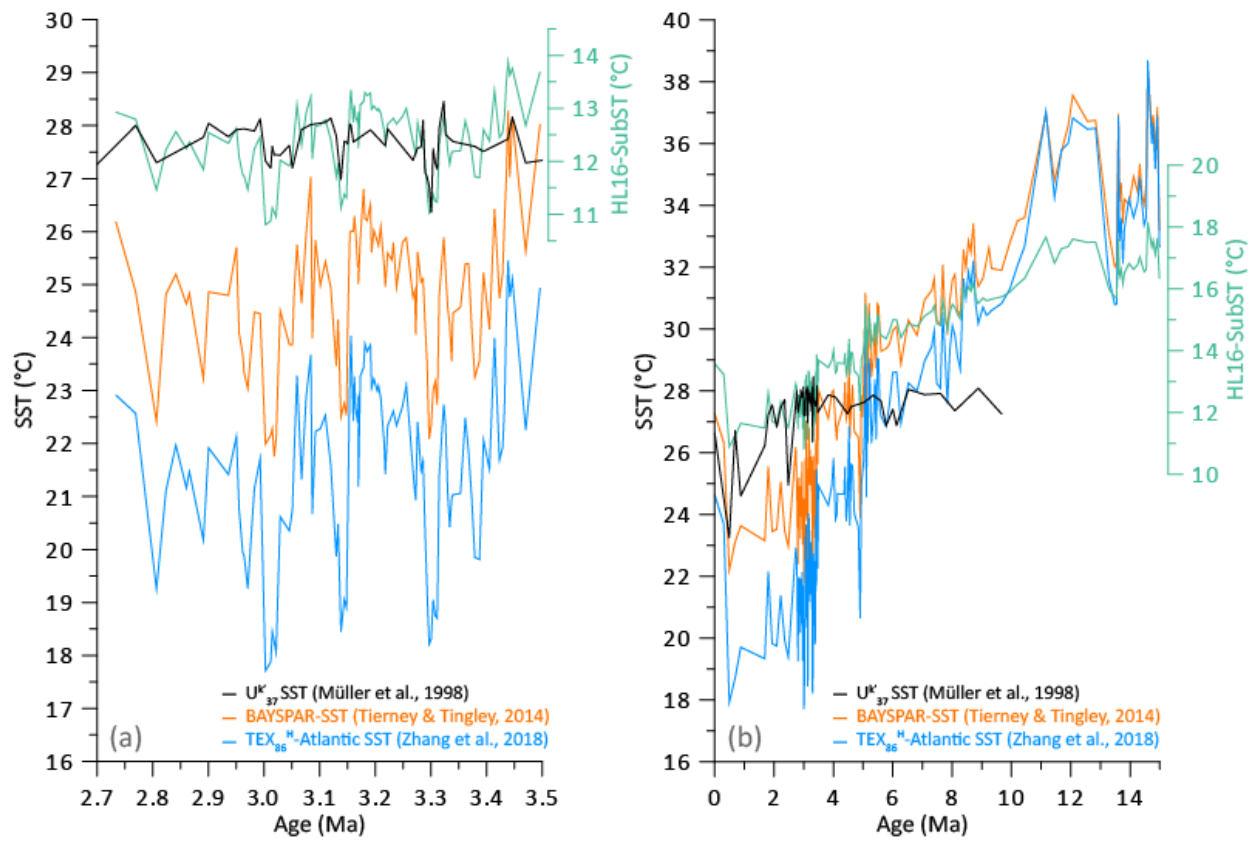

Figure S1. Site 959  $TEX_{86}$  record, calibrated with alternative SST calibrations and with the HL16-SubST calibration (Ho & Laepple, 2015), compared to the  $U^{K'}_{37}$ -SST record. Late Pliocene glacial-interglacial variability in (a), and 15 Myr evolution in (b).

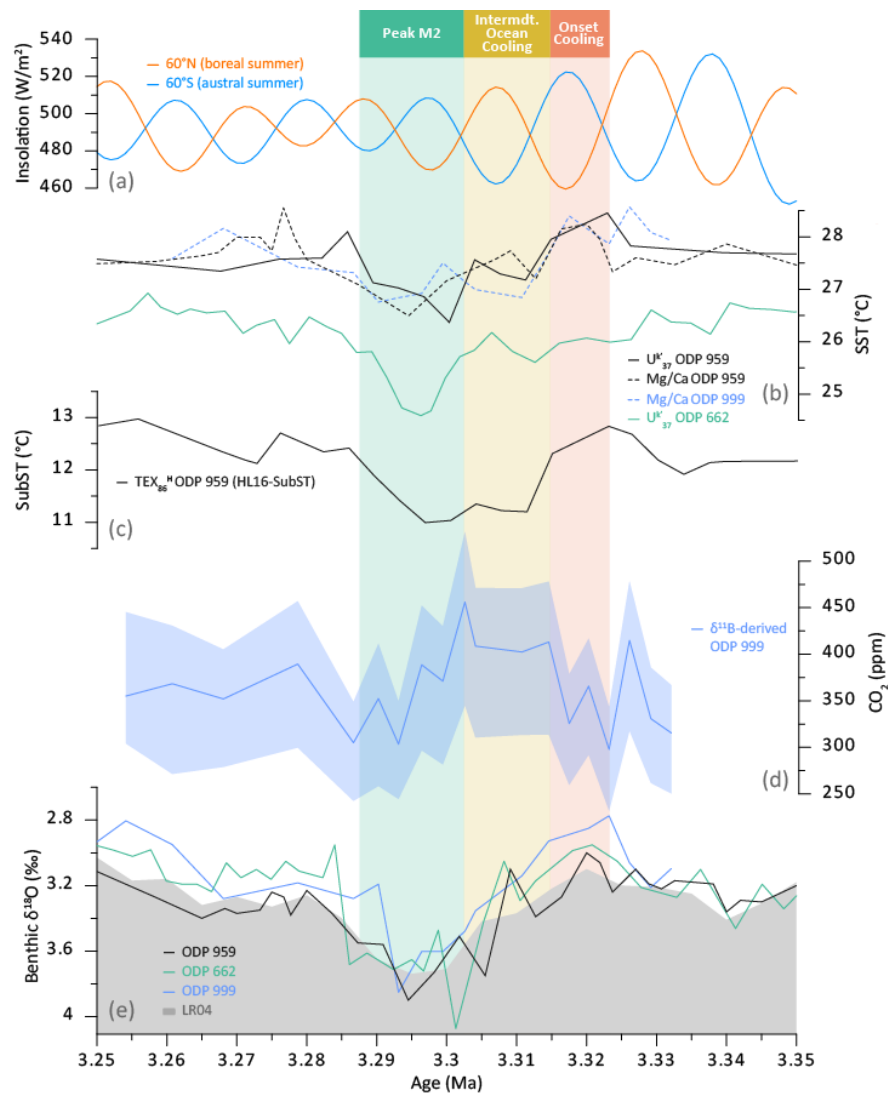

**Figure S2.** Same as Figure 8 of main text, but data on original age models: Site 959 (van der Weijst et al., 2020), 662 (Lisiecki and Raymo, 2005) and 999 (de la Vega et al., 2020).

## References

- Ho, S. L. and Laepple, T.: Flat meridional temperature gradient in the early Eocene in the subsurface rather than surface ocean, *Nat. Geosci.*, 9, doi:10.1038/ngeo2763, 2016.
- Lisiecki, L. E. and Raymo, M. E.: A Pliocene-Pleistocene stack of 57 globally distributed benthic  $\delta^{18}\text{O}$  records, *Paleoceanography*, 20(1), doi:10.1029/2004PA001071, 2005.
- Müller, P. J., Kirst, G., Ruhland, G., Von Storch, I. and Rosell-Melé, A.: Calibration of the alkenone paleotemperature index U37K based on core-tops from the eastern South Atlantic and the global ocean (60°N-60°S), *Geochim. Cosmochim. Acta*, 62(10), 1757–1772, doi:10.1016/S0016-7037(98)00097-0, 1998.
- Tierney, J. E. and Tingley, M. P.: A Bayesian, spatially-varying calibration model for the TEX86 proxy, *Geochim. Cosmochim. Acta*, 127, 83–106, doi:10.1016/j.gca.2013.11.026, 2014.
- de la Vega, E., Chalk, T. B., Wilson, P. A., Bysani, R. P. and Foster, G. L.: Atmospheric CO<sub>2</sub> during the Mid-Piacenzian Warm Period and the M2 glaciation, *Sci. Rep.*, 10(1), 11002, doi:10.1038/s41598-020-67154-8, 2020.
- van der Weijst, C. M. H., Winkelhorst, J., Lourens, L., Raymo, M. E., Sangiorgi, F. and Sluijs, A.: A Ternary Mixing Model Approach Using Benthic Foraminifer  $\delta^{13}\text{C}$ - $\delta^{18}\text{O}$  Data to Reconstruct Late Pliocene Deep Atlantic Water Mass Mixing, *Paleoceanogr. Paleoclimatology*, 35(12), doi:10.1029/2019PA003804, 2020.
- Zhang, Y. G. and Liu, X.: Export Depth of the TEX 86 Signal, *Paleoceanogr. Paleoclimatology*, 666–671, doi:10.1029/2018PA003337, 2018.
